# Supplementary material
Source: Research Square preprint supplement (doi:10.21203/rs.3.rs-9618089/v1)
Supplement: Supplementary file 1 [file 1634f1d1d1caecb035faba6d.docx]

**STARD 2015 Checklist**

Essential Items for Reporting Diagnostic Accuracy Studies

**Manuscript: Carotid Flow Time and Inferior Vena Cava Collapsibility Index for Prediction of Active Bleeding in Upper Gastrointestinal Haemorrhage: A Prospective Emergency Department Study**

Corresponding author: Bilal Yeniyurt, MD — bilalyeniyurt@gmail.com

*Reference: Bossuyt PM, Reitsma JB, Bruns DE, et al. STARD 2015: An Updated List of Essential Items for Reporting Diagnostic Accuracy Studies. BMJ 2015;351:h5527. doi:10.1136/bmj.h5527*

| **Section/Topic** | **Item #** | **Item Description** | **Reported on Page/Section** |
| --- | --- | --- | --- |
| **TITLE OR ABSTRACT** | 1 | Identification as a study of diagnostic accuracy using at least one measure of accuracy (such as sensitivity, specificity, predictive values, or AUC) | Title page; Abstract (Methods, Results) |
| **ABSTRACT** | 2 | Structured summary of study design, methods, results, and conclusions (for specific guidance, see STARD for Abstracts) | Abstract — structured: Background, Methods, Results, Conclusions |
| **INTRODUCTION** | 3 | Scientific and clinical background, including the intended use and clinical role of the index test | Background — paragraphs 1–3 (POCUS as bedside adjunct in UGIB) |
|  | 4 | Study objectives and hypotheses | Background — final paragraph (aim + hypothesis) |
| **METHODS — Study design** | 5 | Whether data collection was planned before the index test and reference standard were performed (prospective study) or after (retrospective study) | Methods — Study Design and Setting (prospective, pre-specified protocol) |
| **METHODS — Participants** | 6 | Eligibility criteria | Methods — Inclusion Criteria; Exclusion Criteria |
|  | 7 | On what basis potentially eligible participants were identified (such as symptoms, results from previous tests, inclusion in registry) | Methods — Inclusion Criteria (haematemesis, melaena, coffee-ground vomiting + clinical decision for endoscopy) |
|  | 8 | Where and when potentially eligible participants were identified (setting, location, and dates) | Methods — Study Design and Setting (Kanuni Sultan Süleyman Training and Research Hospital ED, 1 September 2022–1 September 2023) |
|  | 9 | Whether participants formed a consecutive, random, or convenience series | Methods — Inclusion Criteria (consecutive enrolment); Patient Flow |
| **METHODS — Test methods** | 10a | Index test, in sufficient detail to allow replication | Methods — Ultrasound Protocol: Carotid Flow Time (probe, position, insonation angle, waveform timing, averaging) |
|  | 10b | Reference standard, in sufficient detail to allow replication | Methods — Primary Outcome (upper GI endoscopy with Forrest classification by experienced gastroenterologists/surgeons) |
|  | 11 | Rationale for choosing the reference standard (if alternatives exist) | Background; Methods — Primary Outcome (Forrest classification per ESGE re-bleeding risk criteria) |
|  | 12a | Definition of and rationale for test positivity cut-offs or result categories of the index test, distinguishing pre-specified from exploratory | Methods — Statistical Analysis (Youden index for cut-off identification; raw CFT pre-specified) |
|  | 12b | Definition of and rationale for test positivity cut-offs or result categories of the reference standard, distinguishing pre-specified from exploratory | Methods — Primary Outcome (Forrest Ia–IIc pre-specified as active/high-risk; sensitivity analysis excluding Forrest IIc pre-specified) |
|  | 13a | Whether clinical information and reference standard results were available to the performers/readers of the index test | Methods — Ultrasound Protocol (POCUS performed before endoscopy; emergency physicians acquired index test data) |
|  | 13b | Whether clinical information and index test results were available to the assessors of the reference standard | Methods — Primary Outcome (endoscopists blinded to POCUS findings); Acknowledgements |
| **METHODS — Analysis** | 14 | Methods for estimating or comparing measures of diagnostic accuracy | Methods — Statistical Analysis (ROC, AUC with 95% CI, sensitivity/specificity/PPV/NPV, DeLong pairwise AUC comparison) |
|  | 15 | How indeterminate index test or reference standard results were handled | Methods — Ultrasound Protocol: IVC-CI (one patient with uninterpretable IVCmin excluded from IVC-CI analysis); Results — POCUS Parameters |
|  | 16 | How missing data on the index test and reference standard were handled | Methods — Ultrasound Protocol/Statistical Analysis (case-wise exclusion for uninterpretable measurements; no imputation) |
|  | 17 | Any analyses of variability in diagnostic accuracy, distinguishing pre-specified from exploratory | Methods — Statistical Analysis (pre-specified sensitivity analysis excluding Forrest IIc); Limitations (interobserver variability acknowledged but not formally assessed) |
|  | 18 | Intended sample size and how it was determined | Methods — Sample Size (a priori power analysis: expected AUC 0.85, α = 0.05, power 80% → n = 78) |
| **RESULTS — Participants** | 19 | Flow of participants, using a diagram | Methods — Patient Flow narrative (248 screened → 78 enrolled; CONSORT-style flow may be added as Figure if requested) |
|  | 20 | Baseline demographic and clinical characteristics of participants | Results — Study Population; Table 1 |
|  | 21a | Distribution of severity of disease in those with the target condition | Table 3 (Forrest classification distribution) |
|  | 21b | Distribution of alternative diagnoses in those without the target condition | Table 3 (Forrest IIIa, III); Methods — Exclusion Criteria (variceal/lower GI excluded) |
|  | 22 | Time interval and any clinical interventions between index test and reference standard | Methods — Ultrasound Protocol (“all measurements obtained prior to endoscopy and within 30 minutes of initial resuscitation”) |
| **RESULTS — Test results** | 23 | Cross tabulation of the index test results (or their distribution) by the results of the reference standard | Table 2 (sensitivity/specificity/PPV/NPV for each cut-off); Table 1 (CFT and IVC-CI distributions stratified by active bleeding status) |
|  | 24 | Estimates of diagnostic accuracy and their precision (such as 95% confidence intervals) | Results — Diagnostic Performance; Table 2 (AUC with 95% CI for all variables) |
|  | 25 | Any adverse events from performing the index test or the reference standard | Methods — Ultrasound Protocol (non-invasive bedside POCUS, no test-related adverse events anticipated or observed); none reported |
| **DISCUSSION** | 26 | Study limitations, including sources of potential bias, statistical uncertainty, and generalisability | Discussion — Limitations (single-centre, small event count, spectrum bias, no calibration, no formal interobserver assessment) |
|  | 27 | Implications for practice, including the intended use and clinical role of the index test | Discussion — CFT as a Haemodynamic Biomarker; Comparison with Conventional Risk Scores; Conclusions |
| **OTHER INFORMATION** | 28 | Registration number and name of registry | Methods — Study Design and Setting (observational study; prospective trial registration not mandatory) |
|  | 29 | Where the full study protocol can be accessed | Declarations — Availability of Data and Materials (available from corresponding author upon reasonable request) |
|  | 30 | Sources of funding and other support; role of funders | Declarations — Funding (no funding received) |

*All items have been addressed in the submitted manuscript. Page/section references refer to the structure of the main manuscript. The completed checklist accompanies the manuscript as a supplementary file in accordance with BMC Emergency Medicine submission requirements for diagnostic accuracy studies.*
